# Supplementary material for: Construction of a Stable and Temperature-Responsive Yeast Cell Factory for Crocetin Biosynthesis Using CRISPR-Cas9
Source: PubMed Central journal article supplement (PMC7339864; doi:10.3389/fbioe.2020.00653), 2020-06-30
Supplement: Presentation_1.pdf [file Presentation_1.pdf]

*Supplementary Material*

## Supplementary Figures

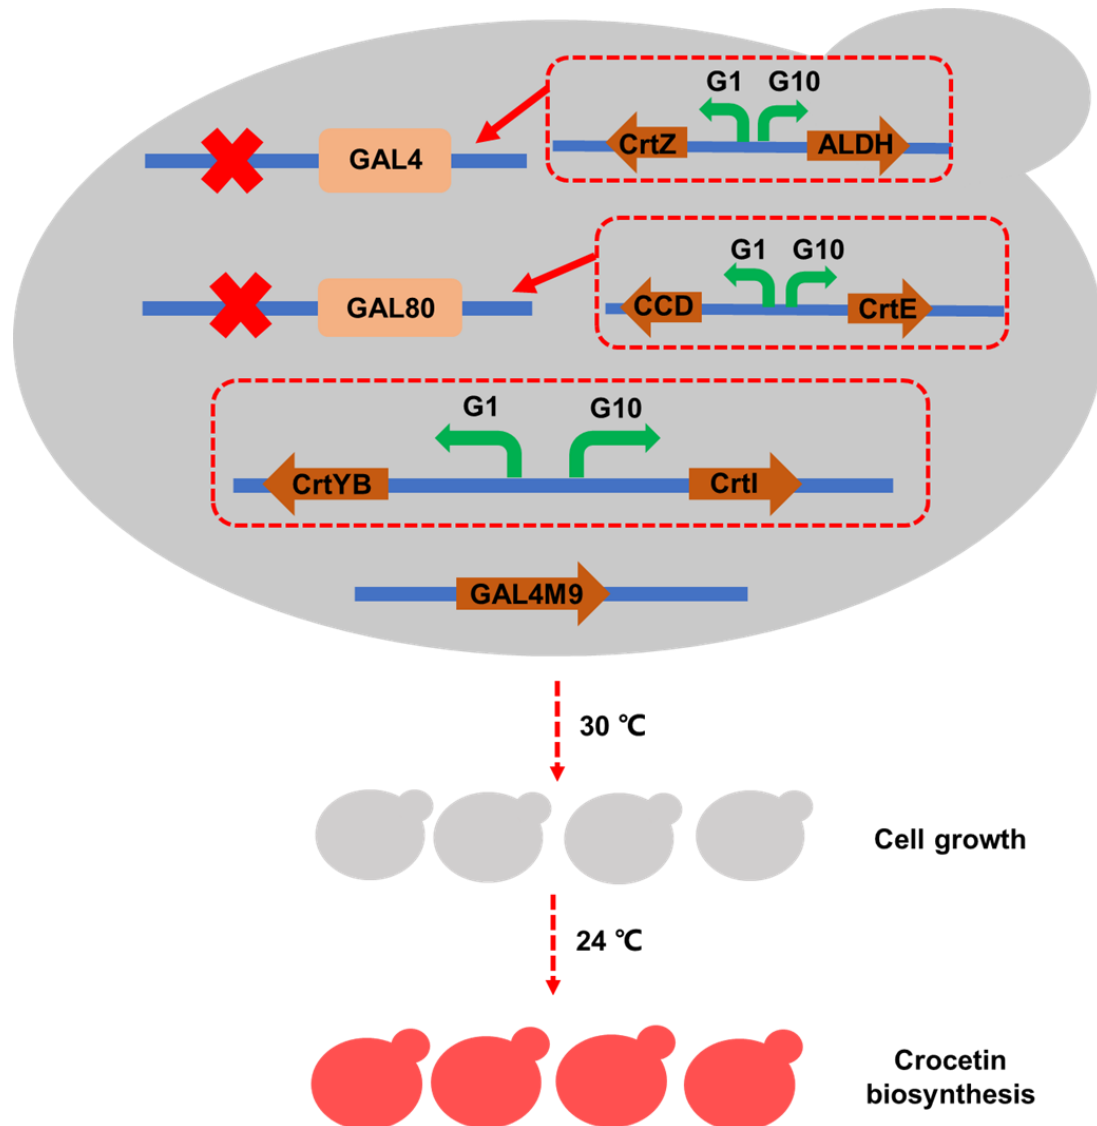

**Supplementary Figure S1** Genome engineering of the GAL regulon for temperature-dependent crocetin biosynthesis, where zeaxanthin biosynthesis and cleavage were coordinately regulated using a *GAL4M9*-based temperature switch. *CrtZ* and *ALDH* expression cassettes were integrated into and replace the *GAL4* locus; *CCD* and *CrtE* expression cassettes were integrated into and replace the *GAL80* locus; *CrtYB* and *CrtI* expression cassettes were integrated into the chromosome locus at ChrXIV: 298,004-298,023; *GAL4M9* expression cassette was integrated into the chromosome locus at ChrIV: 56,137-56,156. G1, *GAL1* promoter; G10, *GAL10* promoter ; *GAL4*, transcription factor for activating GAL regulon genes; *GAL4M9*, *GAL4* mutant showing low temperature induction; *GAL80*, transcriptional regulator involved in the repression of GAL genes by inhibiting *GAL4*; *CrtE*, lycopene  $\epsilon$ -cyclase; *CrtYB*, bifunctional phytoene synthase and lycopene cyclase; *CrtI*, phytoene desaturase; *CrtZ*,  $\beta$ -carotene hydroxylase; *CCD*, carotenoid cleavage dioxygenase; *ALDH*, aldehyde dehydrogenase

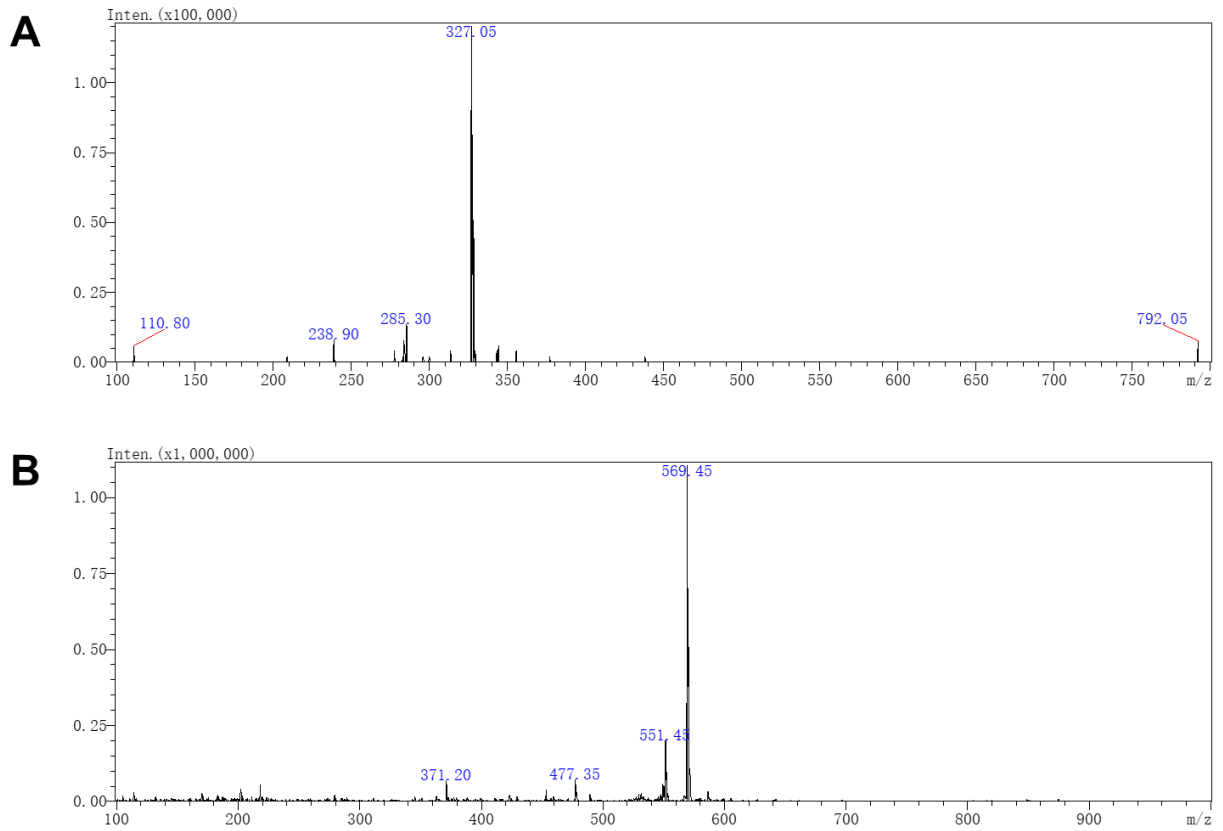

**Supplementary Figure S2** HPLC-MS chromatograms of the crocetin and zeaxanthin standards.  
(A) MS spectra of crocetin standard. (B) MS spectra of zeaxanthin standard

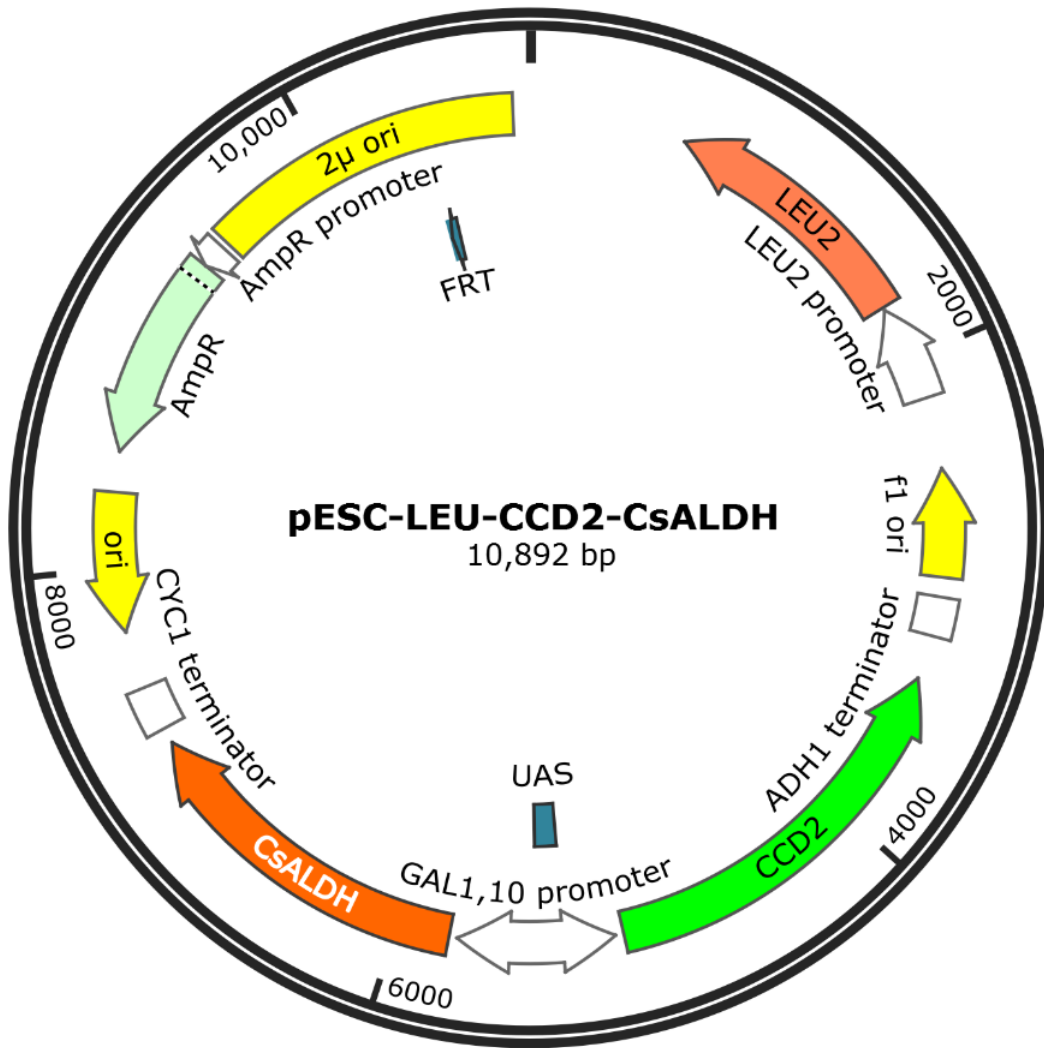

**Supplementary Figure S3** The plasmid map of pESC-LEU-CCD2-CsALDH. *CCD2* was cloned into the *Bam*HI/*Xho*I sites of MCS1 and *CsALDH* was cloned into the *Not*I site of MCS2

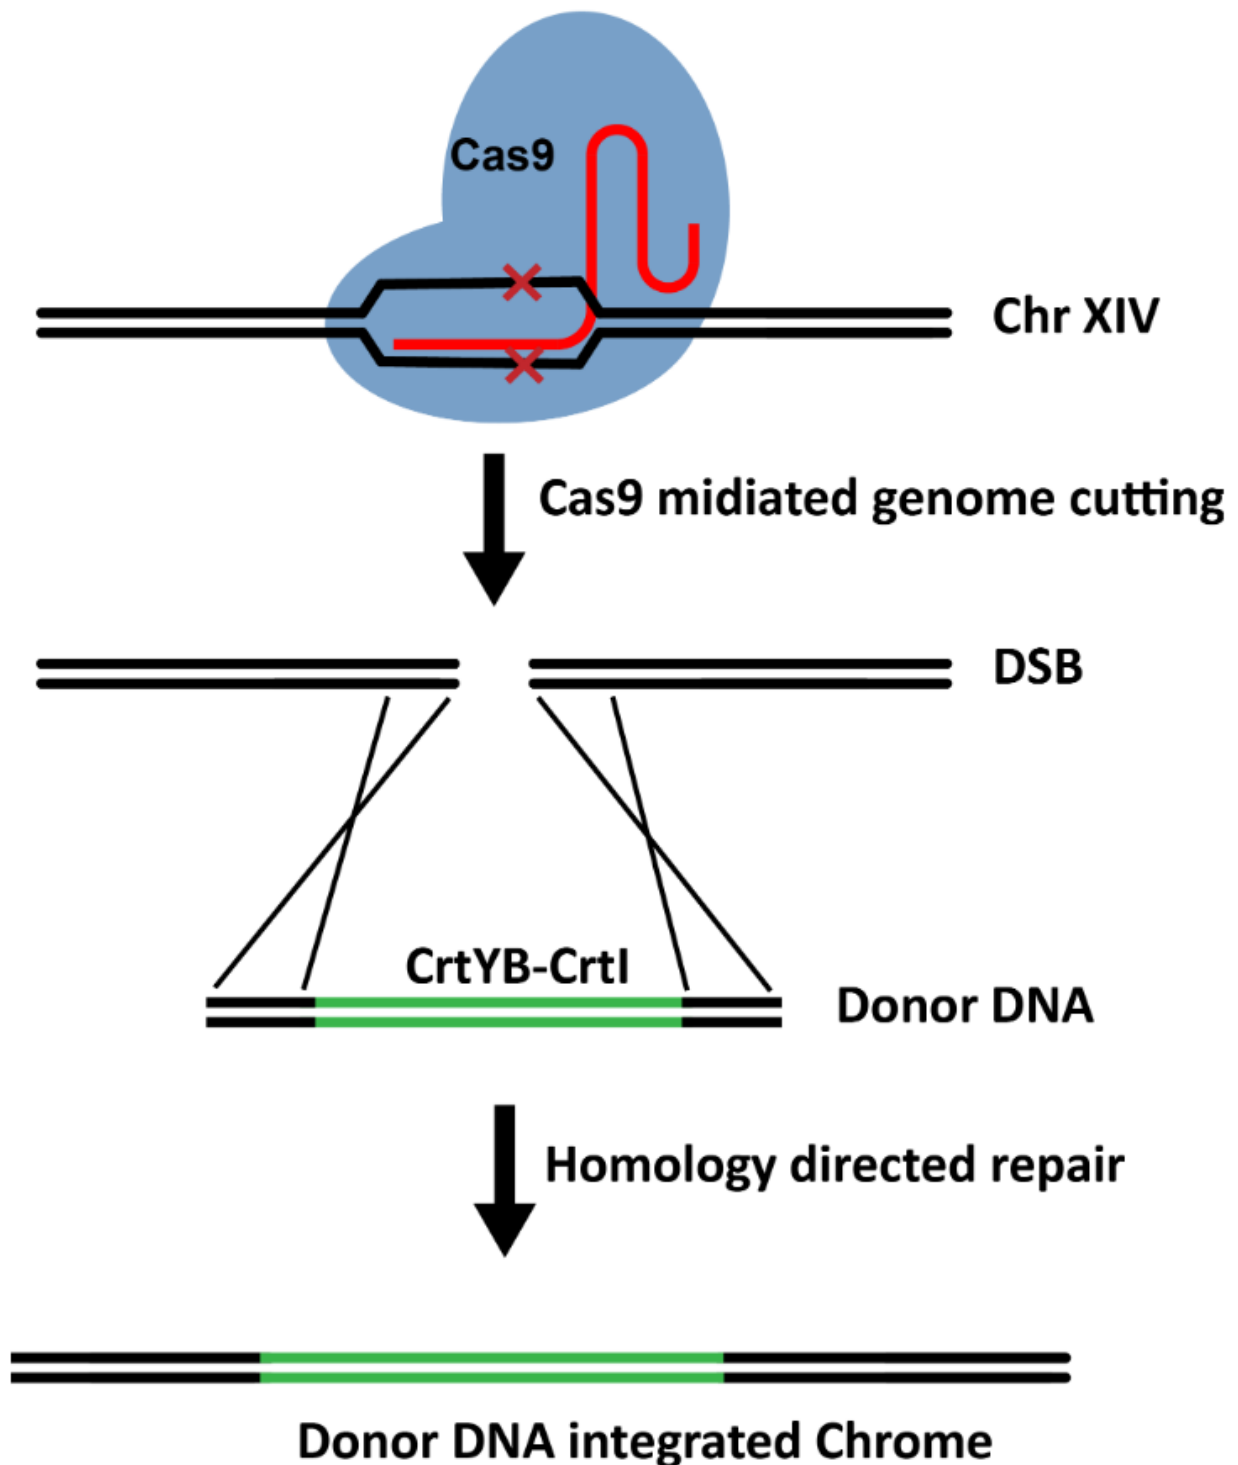

**Supplementary Figure S4** A general scheme for the integration of heterologous gene expression cassettes (with *CrtYB* and *CrtI* expression cassettes shown as an example) into the genome of *S. cerevisiae*. The corresponding gRNA sequences and chromosomal integration loci were provided in Table S4

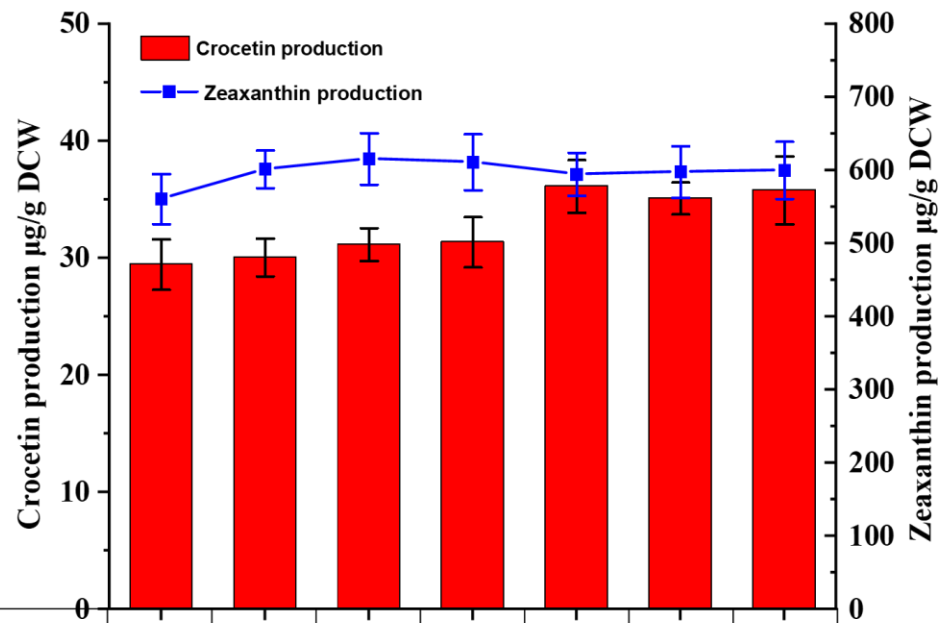

|                                                                   | TL011 | TL012 | TL013 | TL014 | TL015 | TL016 | TL017 |
|-------------------------------------------------------------------|-------|-------|-------|-------|-------|-------|-------|
| $\Delta GAL80-\Delta GAL4-CrtE-CrtYB-CrtI-CrtZ-CCD2-CsALDH-GALM9$ | +     | +     | +     | +     | +     | +     |       |
| $\Delta GAL80-\Delta GAL4-CrtE-CrtYB-CrtI-CrtZ-CCD2-GALM9$        |       |       |       |       |       |       | +     |
| pESC-LEU-CCD2- <i>syaldh</i>                                      |       | +     |       |       |       |       |       |
| pESC-LEU2d-CCD2- <i>syaldh</i>                                    |       |       | +     |       |       |       |       |
| INT-CCD2- <i>syaldh</i>                                           |       |       |       | +     | +     | +     |       |
| INT-CCD2- <i>syaldh</i>                                           |       |       |       |       | +     | +     |       |
| INT-CCD2- <i>syaldh</i>                                           |       |       |       |       |       | +     |       |

**Supplementary Figure S5** Effect of additional copies of *CCD2* and *syaldh* on the production of crocetin. With TL011 as the reference strain, additional copies of *CCD2-syaldh* were introduced either by multi-copy plasmids (TL012 and TL013) or multi-copy genome integration (TL015 and TL016). A *syaldh*-free strain (TL017) was constructed to evaluate the role of *syaldh* overexpression on crocetin production. The strains were cultured at 30 °C for 24 h and then switched to 24 °C fermentation for additional 168 h. Error bars represent SD of biological triplicates.

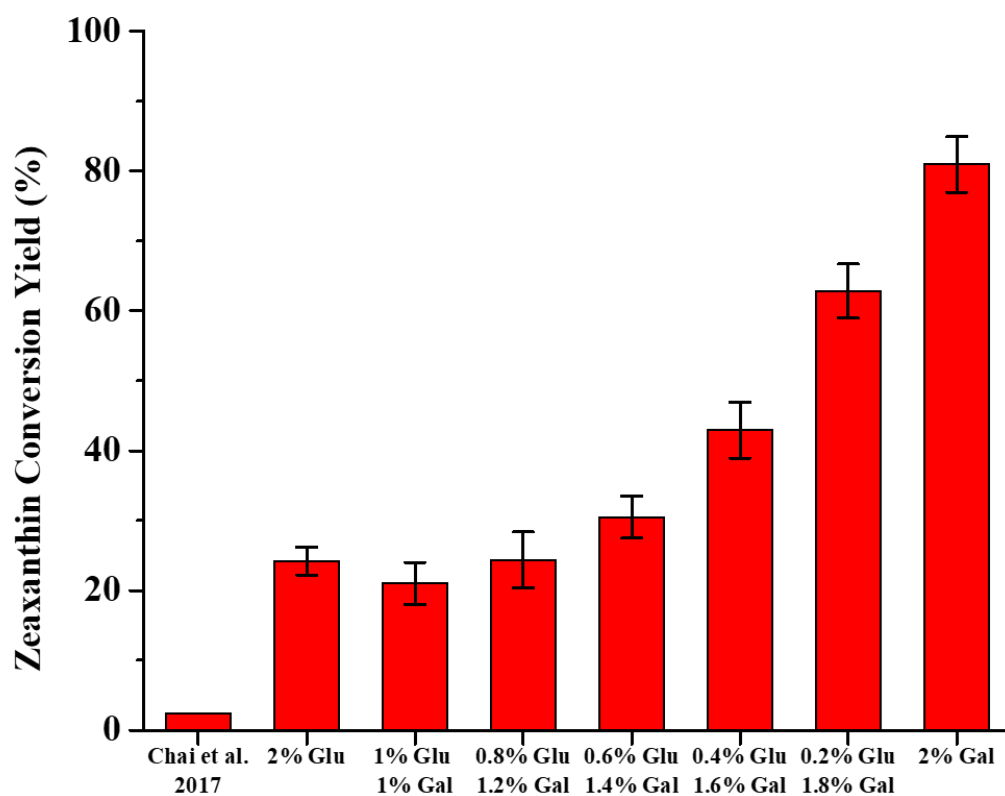

**Supplementary Figure S6** Comparison of zeaxanthin conversion yield of the temperature-responsive cell factories with a previous study for crocetin production. The conversion yield of the previous study (Chai et al., 2017) was calculated for strain SyBE Sc0123C009 cultured in shake flasks at 20 °C, where both crocetin and zeaxanthin production was provided. Error bars represent the standard deviations of three replicates

## Supplementary Tables

### Supplementary Table S1 DNA sequences of genes used in this study

| Genes         | DNA sequences                                                                                                                                                                                                                                                                                                                                                                                                                                                                                                                                                                                                                                                                                                                                                                                                                                                                                                                                                                                                                                                                                                                                                                                                                                                                                                                                                                                                                                                                                                                                                                                                                                                                                                                                                                                                                                        |
|---------------|------------------------------------------------------------------------------------------------------------------------------------------------------------------------------------------------------------------------------------------------------------------------------------------------------------------------------------------------------------------------------------------------------------------------------------------------------------------------------------------------------------------------------------------------------------------------------------------------------------------------------------------------------------------------------------------------------------------------------------------------------------------------------------------------------------------------------------------------------------------------------------------------------------------------------------------------------------------------------------------------------------------------------------------------------------------------------------------------------------------------------------------------------------------------------------------------------------------------------------------------------------------------------------------------------------------------------------------------------------------------------------------------------------------------------------------------------------------------------------------------------------------------------------------------------------------------------------------------------------------------------------------------------------------------------------------------------------------------------------------------------------------------------------------------------------------------------------------------------|
| <i>CCD2</i>   | ATGGCAAACAAGAAGAAGCGGAAAAACGTAAAAAGAAACCGAAACCGCTGAAAGTGCTGATTAC<br>GAAAGTGGACCCGAAACCGCGTAAAGGTATGGCGAGCGTTGCGGTGGACCTGCTGGAAAAAGCAT<br>TTGTGTATCTGCTGAGCGGAAATAGCGCCGCCGATCGTAGCAGTAGCAGCGGCCGCCGCTCGTCGTAA<br>AGAACATTATTATCTGAGTGGTAATTACGCTCCTGTTGGTCATGAAACCCCGCCGAGCGATCATCTGC<br>CGATCCACGGTAGCCTGCCTGAATGTCTGAATGGTGTTTTTCTGCGTGTGGGGCCGAATCCGAAATT<br>TGCGCCGGTTGCAGGTTATAATTGGGTGGACGGTGTGGAATGATTCATGGTCTGCGTATTAAAGATG<br>GTAAAGCCACCTACCTGAGTCGTTATATTAACAAGCCGTTTTAAACAGGAGGAATATTTTGGTTCG<br>CGCGAAATTTATGAAAATTGGTGATCTGCGTGGTCTGCTGGGCTTCTTTACAATCCTGATCCTGGTTC<br>TGCGTACCACCTGAAAGTTATTGATATCAGCTATGGACGTGGTACAGGTAATACGGCGCTGGTGTAT<br>CATAATGGTCTGCTGCTGGCTCTGTCTGAGGAAGACAAACCGTATGTTGTTAAAGTCTGGAAGATG<br>GTGATCTGCAGACCCTGGGAATTTAGACTATGACAAAAAGCTGAGTCATCCTTTTACAGCCCATCC<br>TAAAATCGATCCGCTGACCGATGAAATGTTTACCTTCGGTTATAGCATTAGCCCGCCTTATCTGACCTA<br>TCGTGTTATTTCCAAAGACGGAGTTATGCAAGATCCGGTCCAGATTTCCATTACCAGCCCTACCATTA<br>TGCATGACTTTGCAATTACAGAAAATATGCAATTTTCATGGACCTGCCGCTGTATTTTCAGCCGGAA<br>GAAATGGTTAAAGGTAAATTTGTTAGCAGCTTCCATCCGACCAAACGCGCCCGCATTGGTGTCTGC<br>CACGTTATGCCAAAGACGAGCACCCGATTCGTTGGTTTGATCTGCCTAGTTGTTTTATGACCATAAT<br>GCCAATGCATGGGAGGAAAATGATGAAGTTGTTCTGTTTACGTGTCGTCTGGAAAGCCCGGATCTGG<br>ATATGCTGAGCGGTCCGGCAGAAGAAGAAATTGGGAATAGCAAAAGCGAACTGTATGAAATGCGTT<br>TTAATCTGAAAACCGGGATCACCCAGCCAGAAACAGCTGTCAGTTCCGTCAGTGGACTTTCCACGTAT<br>TAATCAGAGCTATACGGGTCGCAAAACAACAGTATGTTTATTGTACCCTGGGTAATACCAAAATTAAG<br>GTATTGTTAAATTCGACCTGCAGATTGAACCGGAAGCAGGTAAAACCATGCTGGAAGTTGGTGGTAA<br>TGTTACAGGCATTTTTGAGCTGGGGCCGCTCGTTATGGCAGCGAAGCAATTTTTGTGCCGTGTCAG<br>CCTGGTATTAAATCTGATGAAGATGATGGCTACCTGATTTTTTTTGTTCATGATGAAAAACCGCAA<br>ATCTGAAGTTAATGTTATCGATGCAAAAACCATGAGCGCGGAACCGGTTGCAGTTGTGGAGCTGCCG<br>AGCCGTGTGCCGTATGGTTTTTCATGCACTGTTTCTGAATGAAGAAGAACTGCAGAAACATCAGGCCG<br>AAACCTAA |
| <i>CsALDH</i> | ATGGCATTGATGGTGAAAAAGCGAAAGAATGGTGAAAGAACTGCGTGAAAGCTTTAATAAAGG<br>TACGACGCGCAGCTATGAATGGCGCATGAAACAGCTGAAAGCGATGGAAAAATGACCGAAGAA<br>AAAGAAAAAGATATTATGGATGCACTGGAAAGCGATCTGAGCAAACCGCAGCTGGAAAGCTTTCT<br>GCATGAAATTAGCATGGCAAAAAGCGTTTGTGAGTTGTCAGCAAAAAATCTGAAACGTTGGATGA<br>AACCGAAAAAGTTCCGGCACAGCTGACCACCTTCCGAGCGTTGGTAATATTGTTGCAGAACCG<br>TTTGGTGTGTTCTGATTATTAGCGCATGGAATTTCCGTTTCTGCTGAGCCTGGAACCGGTTATTG<br>GTGCAATTGCAGCAGGTAATACCGTTGTTCTGAAACCGAGCGAAATTGCACCGGCAACCGCAGC<br>CTGTTTGCACGTATTCTGCTGGAATATGTTGATACCAGCTGTGTTTCGTGTTGTTGAAGGTGCAGTTC<br>CGGAAACCACCGCACTGCTGGAACAGAAATGGGATAAAATTTTTTATACCGGTAATGGTAAAGTTG<br>GTCGTGTTGTTATGGCAGCAGCAGCAAAACATCTGACCCCGGTTGTTCTGGAACCTGGGTGGTAAAT<br>GTCCGGTTGTTGTTGATAGCAATATTGATCTGAAAGTTGCAACCAAACGTGTTGTTGTTGGTAAATG<br>GGGTTGTAATAATGGTCAGGCATGTATTGCACCGGATTATATTATTACCACCAAAAAGCTTTGCACCG<br>AAACTGGTTGAAAGCCTGAAAATTACCCTGGAACGTTTTTATGGTGAAGATCCGCTGGAAACCGA                                                                                                                                                                                                                                                                                                                                                                                                                                                                                                                                                                                                                                                                                                                                                                                                                                                                                                                    |



*syaldh*

AGATCTGAGCCGTATTGTTAATGAAAATCATGTTGCACGTCTGGCACGTCTGCTGGATGATGATATG  
GTTAGCGGTAAAAATTATTTATGGTGGTAAACGTGATGAAAAACGTCTGAAAATTGCACCGACCCTG  
CTGCTGGATGTTCCGGATGATAGCCTGATTATGAAAGAAGAAATTTTTGGTCCGCTGCTGCCGATTA  
TTACCGTTGATAAAATTGAAGATAGCTTTGCAGTTATTAATAGCAAACCAAACCGCTGGCAGCATA  
TCTGTTTACCAAAAATAAAAATCTGGAACGTATGTTTGTGAAACCGTTAGCAGCGGTGGTATGCT  
GATTAATGATACCGTTCTGCATGTTGCAAATCCGTATCTGCCGTTTGGTGGTGTGGTAAAAGCGGT  
ACCGGTAGCTATCATGGTAAATTTAGCTTTAATGCATTTAGCCATAAAAAAGCAGTTCTGAGCCGTG  
GTTTTGGTGGTGAAGTTGGTGCACGTTATCCGCCGTATACCGATAAAAAACGTAAAATTATTCGTGC  
ACTGCTGGCAGGTAATATTATTGCACTGGTCTGGCATTTTTTGGTTTTAGCAAAGCTAA  
ATGAACACCGCCAAAACCGTTGTGGCCGAACAGCGTGACTTTTTTCGCCAGGGGAAAACCAAAA  
GCGTGCAGGACCGCCTGACCGCACTGGCCAAACTGAAAACCCAGATCCAGGCCAGGAAGAAGA  
AATCATTAAAGCACTGAAACAAGATTCGGCAAACCAACCTTTGAAAGCTATGTTAATGAAATTCT  
GGGTGTTATTCGTGAAATCAATTACTATCAAAAACACCTGCAACAGTGGAGCAAACCGCAGCGTGT  
TGGAACCAATCTGATGGTGTTCGGCAAGCGCACAGCTGCGTCCAGAGCCTCTGGGTGTTGTTCT  
GATTATCTCTCCTTGGAATTACCCTTTTTATCTGTGTCTGATGCCGCTGATTGGAGCAATCGCCGCCG  
GTAATTGTGTTGTTGTTAAACCGTCAGAATATACCCCTGCAATTAGTGGTGTATCACCCGTCTGATT  
CAGAATGTTTTTCTCCTGCCTGGGCAACCGTTGTTGAAAGTGATGAGACAATCAGTCAGCAGCTG  
CTGCAGGAAAAATTTGACCATATTTTTTTACCAGGTAGCCCGCGTGTGGCCGTCTGATTATGGCAG  
CAGCAGCCGAACAGCTGACCCCGGTTACCCTGGAACCTGGGCGGTAAAAGCCCTTGTGTTGTTGAT  
CGTGAATTAATCTGCAGGAAACCGCAAACGTATTATGTGGGGCAAACCTGGTAAATGCAGGACA  
GACCTGTGTTGCACCGGATTATCTGCTGGTTGAACAGTCTTGTCTGGAGCAGCTGCTGCCTGCCCT  
GCAGCAGGCGATTCAAATGCTGTTCGGTAAAATCCTGCGCACAGTCCGGATTATACGCGTATTGT  
TAATCAGCAACAATGGAGCCGTCTGGTTAGCCTGCTGAGCCATGGTAAAGTTATTACCCGTGGCGA  
TCATAATGAAGGTGATCGTTATATTGCACCGACCCTGATTATTGATCCGGATCTGAATAGCCCGCTGA  
TGCAAGAAGAGATTTTCGGTCCGATTCTGCCGATTCTGACCTATCAAAGCCTGAGCGAAGCAATTG  
ATTTTATTAATATCAAACCTAAACCTCTGGCACTGTATTTTTTCTCTAATAATCGTCAGAAACAGGAG  
GAAATTCTGCAAAGCACCTCCAGCGGTAGCGTGTGTCTGAATGATATTCTGCTGCACCTGACCGTG  
ACCGACCTGCCTTTTTGGTGGTGTGGGCGAAAGCGGTATGGGTCGCTATCATGGGAAAGCAACATTT  
GACACCTGAGTAATTATAAAAGCATCCTGCGTCTGCTTTTTTGGGGCGAAACCAATCTGCGTTATA  
GTCCGTATGGTAAAAGATGAACCTGATTAATAAGCTGTTTCAGTCTCGAGTAA

---

## Supplementary Table S2 Strains and plasmids used in this study

| Plasmid/strain name            | Description                                                                                                       | Source                        |
|--------------------------------|-------------------------------------------------------------------------------------------------------------------|-------------------------------|
| <b>Plasmids</b>                |                                                                                                                   |                               |
| pRS41K-SpCas9                  | CEN/ARS; G418; AmpR; <i>TEF1p-SpCas9-TEF1t</i>                                                                    | Lian J et al., 2017           |
| p423-SpSgH                     | 2 $\mu$ ; <i>HIS3</i> ; AmpR; <i>SNR52p-SUP4t</i>                                                                 | Lian J et al., 2017           |
| p426-SpSgH                     | 2 $\mu$ ; <i>URA3</i> ; AmpR; <i>SNR52p-SUP4t</i>                                                                 | Lian J et al., 2017           |
| pESC-URA                       | 2 $\mu$ ; <i>URA3</i> ; AmpR; <i>GAL1p-MCS1-CYC1t</i> ; <i>GAL10p-MCS2-ADH1t</i><br>(NCBI Accession AF063585)     | Agilent Technologies,<br>Inc. |
| pESC-LEU                       | 2 $\mu$ ; <i>LEU2</i> ; AmpR; <i>GAL1p-MCS1-CYC1t</i> ; <i>GAL10p-MCS2-ADH1t</i><br>(NCBI Accession AF063849)     | Agilent Technologies,<br>Inc  |
| pESC-LEU2d                     | 2 $\mu$ ; <i>LEU2d</i> ; AmpR; <i>GAL1p-MCS1-CYC1t</i> ; <i>GAL10p-MCS2-ADH1t</i><br>(Addgene plasmid #20120)     | Ro DK et al., 2006            |
| pUMRI- <i>PACT1-GAL4M9</i>     | loxP-KanMX-URA3-pBR322ori-loxP, <i>TADH1-GAL4M9-PACT1-MCS2-T<sub>CYC1</sub></i> , LPP1 homologous arm             | Zhou, P et al., 2018          |
| pESC-URA- <i>CCD2-CrtE</i>     | 2 $\mu$ ; <i>URA3</i> ; AmpR; <i>GAL1p-CCD2-CYC1t</i> ; <i>GAL10p-CrtE-ADH1t</i>                                  | This study                    |
| pESC-URA- <i>CrtYB-CrtI</i>    | 2 $\mu$ ; <i>URA3</i> ; AmpR; <i>GAL1p-CrtYB-CYC1t</i> ; <i>GAL10p-CrtI-ADH1t</i>                                 | This study                    |
| pESC-URA- <i>CrtZ-CsALDH</i>   | 2 $\mu$ ; <i>URA3</i> ; AmpR; <i>GAL1p-CrtZ-CYC1t</i> ; <i>GAL10p-CsALDH-ADH1t</i>                                | This study                    |
| pESC-URA- <i>CrtZ-syaldh</i>   | 2 $\mu$ ; <i>URA3</i> ; AmpR; <i>GAL1p-CrtZ-CYC1t</i> ; <i>GAL10p-syaldh-ADH1t</i>                                | This study                    |
| pESC-LEU- <i>CCD2-CsALDH</i>   | 2 $\mu$ ; <i>LEU2</i> ; AmpR; <i>GAL1p-CrtZ-CYC1t</i> ; <i>GAL10p-CsALDH-ADH1t</i>                                | This study                    |
| pESC-LEU- <i>CCD2-syaldh</i>   | 2 $\mu$ ; <i>LEU2</i> ; AmpR; <i>GAL1p-CrtZ-CYC1t</i> ; <i>GAL10p-syaldh-ADH1t</i>                                | This study                    |
| pESC-LEU2d- <i>CCD2-CsALDH</i> | 2 $\mu$ ; <i>LEU2d</i> ; AmpR; <i>GAL1p-CrtZ-CYC1t</i> ; <i>GAL10p-CsALDH-ADH1t</i>                               | This study                    |
| pESC-LEU2d- <i>CCD2-SyALDH</i> | 2 $\mu$ ; <i>LEU2d</i> ; AmpR; <i>GAL1p-CrtZ-CYC1t</i> ; <i>GAL10p-SyALDH-ADH1t</i>                               | This study                    |
| <b>Strains</b>                 |                                                                                                                   |                               |
| BY4741                         | MATa: <i>his3<math>\Delta</math>1 leu2<math>\Delta</math>0 met15<math>\Delta</math>0 ura3<math>\Delta</math>0</i> | ATCC                          |
| TL001                          | BY4741 with pRS41K-SpCas9                                                                                         | This study                    |
| TL002                          | TL001- $\Delta$ <i>GAL80::GAL1p-CCD2-CYC1t-GAL10p-CrtE-ADH1t</i>                                                  | This study                    |
| TL003                          | TL002- <i>GAL1p-CrtYB-CYC1t-GAL10p-CrtI-ADH1t</i>                                                                 | This study                    |
| TL004                          | TL003- <i>PACT1-GAL4M9-TADH1</i>                                                                                  | This study                    |
| TL005                          | TL004- $\Delta$ <i>GAL4::GAL1p-CrtZ-CYC1t-GAL10p-CsALDH-ADH1t</i>                                                 | This study                    |
| TL006                          | TL005/pESC-LEU- <i>CCD2-CsALDH</i>                                                                                | This study                    |
| TL007                          | TL005/pESC-LEU2d- <i>CCD2-CsALDH</i>                                                                              | This study                    |
| TL008                          | TL005- <i>GAL1p-CCD2-CYC1t-GAL10p-CsALDH-ADH1t</i>                                                                | This study                    |
| TL009                          | TL008- <i>GAL1p-CCD2-CYC1t-GAL10p-CsALDH-ADH1t</i>                                                                | This study                    |
| TL010                          | TL009- <i>GAL1p-CCD2-CYC1t-GAL10p-CsALDH-ADH1t</i>                                                                | This study                    |
| TL011                          | TL004- $\Delta$ <i>GAL4::GAL1p-CrtZ-CYC1t-GAL10p-SyALDH-ADH1t</i>                                                 | This study                    |
| TL012                          | TL011/pESC-LEU- <i>CCD2-syaldh</i>                                                                                | This study                    |
| TL013                          | TL011/pESC-LEU2d- <i>CCD2-syaldh</i>                                                                              | This study                    |
| TL014                          | TL011- <i>GAL1p-CCD2-CYC1t-GAL10p-syaldh-ADH1t</i>                                                                | This study                    |
| TL015                          | TL014- <i>GAL1p-CCD2-CYC1t-GAL10p-syaldh-ADH1t</i>                                                                | This study                    |
| TL016                          | TL015- <i>GAL1p-CCD2-CYC1t-GAL10p-SyALDH-ADH1t</i>                                                                | This study                    |
| TL017                          | TL004- $\Delta$ <i>GAL4::GAL1p-CrtZ-CYC1t</i>                                                                     | This study                    |

**Supplementary Table S3** List of primers used in this study

| Primer name                      | Sequence (5'-3')                                             |
|----------------------------------|--------------------------------------------------------------|
| <b>For plasmids construction</b> |                                                              |
| CrtYB-BamHI-F                    | AACCCCGGATCCATGACGGCTCTCGCATATTA                             |
| CrtYB-XhoI-R                     | GCTTACTCGAGTTACTGCCCTTCCCATCCGC                              |
| CrtI-NotI-F                      | CGTCATCCTTGTAATCCATCGATACTAGTTTCAGAAAGCAAGAACACCAAC          |
| CrtI-NotI-R                      | CGAATTCAACCCCTCACTAAAGGGCGGCCGCATGGGAAAAGAACAAGATCA          |
| CCD2-BamHI-F                     | AACCCCGGATCCATGGCAAACAAAGAAGAAGC                             |
| CCD2-XhoI-R                      | GCTTACTCGAGTTAGGTTTCGGCCTGATGTT                              |
| CrtE-NotI-F                      | TCTGGCGAAGAATTGTTAATTAAGAGCTCTCACAGAGGGATATCGGCTAG           |
| CrtE-NotI-R                      | AACCCTCACTAAAGGGCGGCCGCACTAGTATGGATTACGCGAACATCCT            |
| CrtZ-BamHI-F                     | AACCCCGGATCCATGTTGTGGATTTGGAATGC                             |
| CrtZ-XhoI-R                      | GCTTACTCGAGTTACTTCCCGGATGCGGGCTC                             |
| CsALDH-NotI-F                    | TTGTAATCCATCGATACTAGTGC GGCCGCTTAGCTTTTGCTAAAACCAA           |
| CsALDH-NotI-R                    | AACCCTCACTAAAGGGCGGCCGCACTAGTATGGCATTGATGGTGAAAAAG           |
| SyALDH-NotI-F                    | TTGTAATCCATCGATACTAGTGC GGCCGCTTACTCGAGACTGAACAGCTTTT        |
| SyALDH-NotI-R                    | AAGTAAGAATTTTGTAAAATTCGAATTCATGAACACCGCCAAAACCGTT            |
| <b>For genome integration</b>    |                                                              |
| ΔGAL80-INT-CCD2-CrtE-F           | CAATCTCGATAGTTGGTTTCCCGTCTTTCCACTCCCGTCTTCAGGCTGCGCAACTGTT   |
| ΔGAL80-INT-CCD2-CrtE-R           | CGTTCGCTGCACTGGGGGCCAAGCACAGGGCAAGATGCTTAGTGAGCTGATACCGCTCG  |
| INT-CrtYB-CrtI-F                 | CTATGTGACGCTGTGTATTCTTTGTTGTAGTTATGCTCCATTTCAGGCTGCGCAACTGTT |
| INT-CrtYB-CrtI-R                 | TGTACGCTATACATTTACGTGCTGAGCTCCTAGGAAAGCTAGTGAGCTGATACCGCTCG  |
| ΔGAL4-INT-CrtZ-ALD-F             | GAAGTGAACCTGCGGGGTTTTTTCAGTATCTACGATTCATTTTCAGGCTGCGCAACTGTT |
| ΔGAL4-INT-CrtZ-ALD-R             | ATCATTTTAAGAGAGGACAGAGAAGCAAGCCTCCTGAAAGAGTGAGCTGATACCGCTCG  |
| INT-GAL4M9-F                     | GTTTTCTTATTTCTTTCTTTTTAAAAAACTTTCTTAATATTGTAGGCCTCTTCGCTATT  |
| INT-GAL4M9-R                     | TTGAGAAAAAAAGTGTATATCATTACATTACTTTACACCAAGTCGTATTACGGATCCTC  |
| INT-ALDH-F(TL008,014)            | ATTGTAGTGCAGAAGGTAACAGCAAAAACAAATAGTTACAGGACGACCTCATGCTATAC  |
| INT-ALDH-R(TL008,014)            | GAATTAGTTTATTAGAGGAAGTGCCAGGCGACATAAAGTTCTTCGAGCGTCCCAAAACC  |
| INT-ALDH-F(TL009,015)            | TCTAGTATCAAAGAACTTACTATGACGCAGTTTAGGATCGAGCGACCTCATGCTATAC   |
| INT-ALDH-R(TL009,015)            | GACACTGAATAAACAAGGGGCTTTACGATGGAGTAGTAGACTTCGAGCGTCCCAAAACC  |
| INT-ALDH-F(TL010,016)            | TACTGTTGATTGTTTCGTTTATTTGTATAATTGAGTTTACAGAGCGACCTCATGCTATAC |
| INT-ALDH-R(TL010,016)            | TTATAAGTTTGCTTTTTGTCACCTCTCTTGCCCTAATTACCTTCGAGCGTCCCAAAACC  |

\* Restriction sites are underlined.

**Supplementary Table S4** The sequences of SgRNAs in this study

| SgRNA Name                               | Sequence (5'-3')     | Chromosome locus         |
|------------------------------------------|----------------------|--------------------------|
| Sg- $\Delta$ GAL80                       | GATAGTGATAGCTATCCAAG | ChrXIII: 171,860-171,879 |
| Sg- $\Delta$ GAL4                        | TTCTGTCGCGATATACACAG | ChrXVI: 81,346-81,365    |
| Sg-INT- CrtYB-CrtI                       | CGATACAGTGGCTGCTCATG | ChrXIV: 298,004-298,023  |
| Sg-INT-GAL4M9                            | ACACGTTTGTGGTTATAAGG | ChrIV: 56,137-56,156     |
| Sg-INT- CCD2-ALDH (for TL 008 and TL014) | TAAAGCCACCACATCGCAA  | ChrXVII: 562,256-562,275 |
| Sg-INT- CCD2-ALDH (for TL009 and TL015)  | CCTGTGGTGACTACGTATCC | ChrXIV: 262,867-262,886  |
| Sg-INT- CCD2-ALDH (for TL0010 and TL016) | CAACAATTGTTACAATAGTA | ChrVII: 508,439-508,458  |

## Supplementary References

Chai, F., Wang, Y., Mei, X., Yao, M., Chen, Y., Liu, H., et al. (2017). Heterologous biosynthesis and manipulation of crocetin in *S. cerevisiae*. *Microbial Cell Factories*. 16:1, 54. doi: 10.1186/s12934-017-0665-

1

Lian, J., Hamedirad, M., Hu, S., Zhao, H. (2017). Combinatorial metabolic engineering using an orthogonal tri-functional CRISPR system. *Nat Commun*. 8:1,1688. doi: 10.1038/s41467-017-01695-x

Ro, D. K., Paradise, E. M., Ouellet, M., Fisher, K. J., Newman, K. L., Ndungu, J. M., et al. (2006). Production of the antimalarial drug precursor artemisinic acid in engineered yeast. *Nature* 440, 940-943. doi: 10.1038/nature04640

Zhou, P., Xie, W., Yao, Z., Zhu, Y., Ye, L., Yu, H. (2018). Development of a temperature-responsive yeast cell factory using engineered GAL4 as a protein switch. *Biotechnol. Bioeng*. 115:5,1321-1330. doi: 10.1002/bit.26544
